# Supplementary material
Source: PubMed Central journal article supplement (PMC7592191)
Supplement: NIHMS1629620-supplement-2.pdf [file NIHMS1629620-supplement-2.pdf]

**Supplemental Table 1.** Multivariable logistic regression analysis of risk factors for the primary outcome measure (aggregate incidence of pancreatic fistula/leak/abscess) across all study participants (N = 800). Due to covariance with gland texture, pancreatic duct size could not be included in the final model. ASA, American Society of Anesthesiologists; BMI, body mass index; C.I., confidence interval.

| Characteristic               | Multivariable Analysis   |                 |
|------------------------------|--------------------------|-----------------|
|                              | Odds Ratio<br>[95% C.I.] | <i>p</i> -value |
| <b>Treatment Cohort</b>      |                          |                 |
| Pasireotide                  | 0.65 [0.38-1.13]         | 0.13            |
| Placebo                      | Reference                |                 |
| <b>Age at Surgery, years</b> | 0.98 [0.97-1.00]         | 0.10            |
| <b>BMI, kg/m<sup>2</sup></b> | 1.04 [1.00-1.08]         | <b>0.049</b>    |
| <b>ASA Score</b>             |                          |                 |
| 1-2                          | Reference                |                 |
| 3                            | 1.31 [0.78-2.17]         | 0.59            |
| 4                            | 1.16 [0.30-4.42]         |                 |
| <b>Gender</b>                |                          |                 |
| Female                       | 1.39 [0.91-2.14]         | 0.13            |
| Male                         | Reference                |                 |
| <b>Resection</b>             |                          |                 |
| Distal pancreatectomy        | 0.90 [0.56-1.45]         | 0.67            |
| Whipple                      | Reference                |                 |
| <b>Gland Texture</b>         |                          |                 |
| Soft                         | 1.67 [1.04-2.71]         | <b>0.035</b>    |
| Firm                         | Reference                |                 |

**Supplemental Table 2.** Test of interaction for pasireotide- versus placebo-receiving cohorts with known risk factors for the primary outcome. No subgroup was identified that demonstrated a change in risk of primary outcome.

| <b>Pasireotide vs. Placebo Compared With:</b> | <b>Odds Ratio</b> | <b>95% C.I.</b> | <b>p-value</b> |
|-----------------------------------------------|-------------------|-----------------|----------------|
| <b>Duct Size</b>                              |                   |                 |                |
| > 4 mm                                        | 0.63              | [0.30 - 1.32]   | 0.74           |
| ≤ 4 mm                                        | 0.53              | [0.30 - 0.95]   |                |
| <b>Gland Texture</b>                          |                   |                 |                |
| Firm                                          | 0.36              | [0.18 - 0.73]   | 0.12           |
| Soft                                          | 0.77              | [0.41 - 1.43]   |                |
| <b>Resection Type</b>                         |                   |                 |                |
| Whipple                                       | 0.66              | [0.37 - 1.16]   | 0.46           |
| Distal Pancreatectomy                         | 0.46              | [0.21 - 0.99]   |                |
| <b>Risk Profile</b>                           |                   |                 |                |
| High (≤4 mm <i>and</i> soft)                  | 0.40              | [0.31 - 1.29]   | 0.69           |
| Moderate (≤4 mm <i>or</i> soft)               | 0.65              | [0.28 - 1.49]   |                |
| Low (>4 mm duct, firm)                        | 0.63              | [0.16 - 1.01]   |                |
